# Supplementary material for: Hierarchically ordered mesoporous carbon/graphene composites as supercapacitor electrode materials
Source: Royal Society of Chemistry journal article supplement (doi:10.1039/c6nr04130b), 2016-01-01
Supplement: c6nr04130b1.pdf [file c6nr04130b1.pdf]

## Supporting Information

### 1 Cyclic voltammetry curves

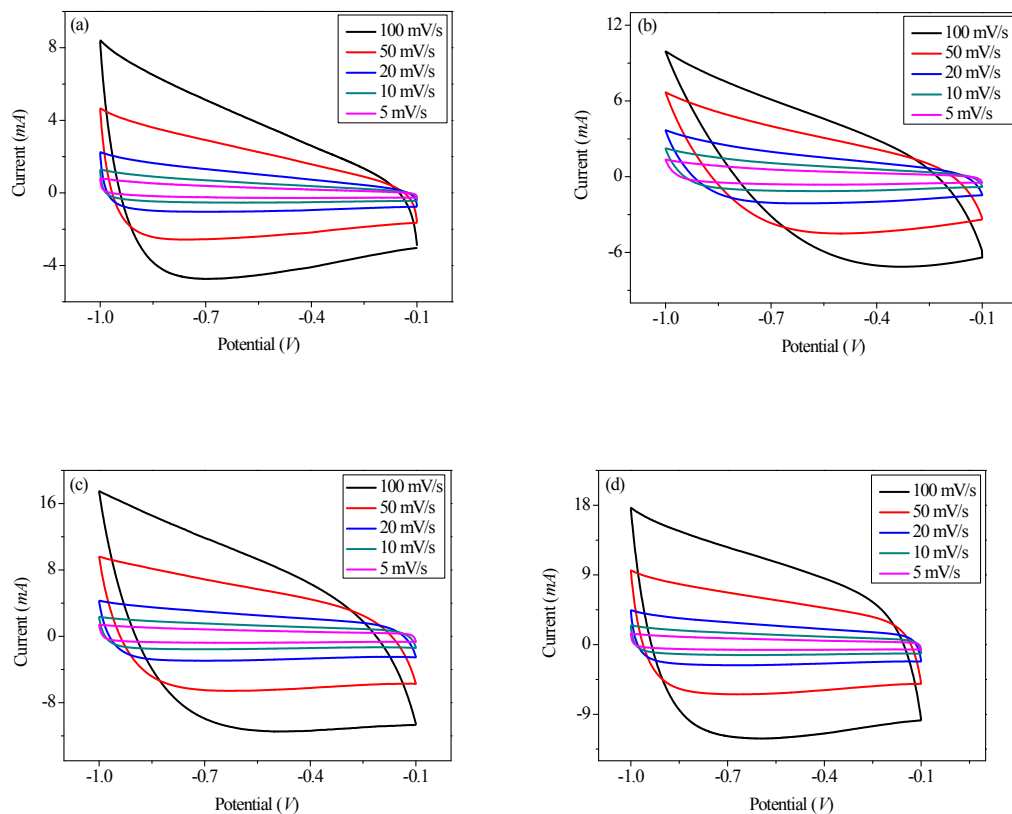

Fig. S1 Cyclic voltammetry curves of of PFC-K (a), OMC (b), OMC-K (c) and OMC/G-K (d) as a function of scan rates.

### 2. Specific surface area

| Sample                                         | PF:GO=9.5:0.05 | PF:GO=9.0:0.10 | PF:GO=8.5:0.15<br>(OMC/G-K) | PF:GO=8.0:0.20 |
|------------------------------------------------|----------------|----------------|-----------------------------|----------------|
| $S_{\text{BET}}$ ( $\text{m}^2\text{g}^{-1}$ ) | 1048.73        | 1223.92        | 2109.21                     | 2049.62        |

### 3. Electrochemical performance of mechanical mixing with OMC and graphene

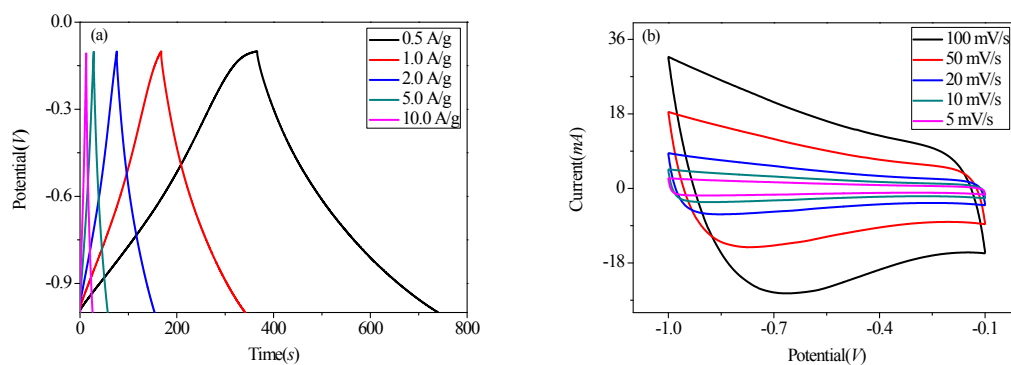

Fig. S2 (a) The first charge-discharge curves of mechanical mixing with OMC and graphene (OMC+G)-K at different current densities, (b) cyclic voltammetry curves of (OMC+G)-K at different scanning rates.

#### 4. Surface Morphologies of Ordered Mesoporous Carbon/Graphene composites

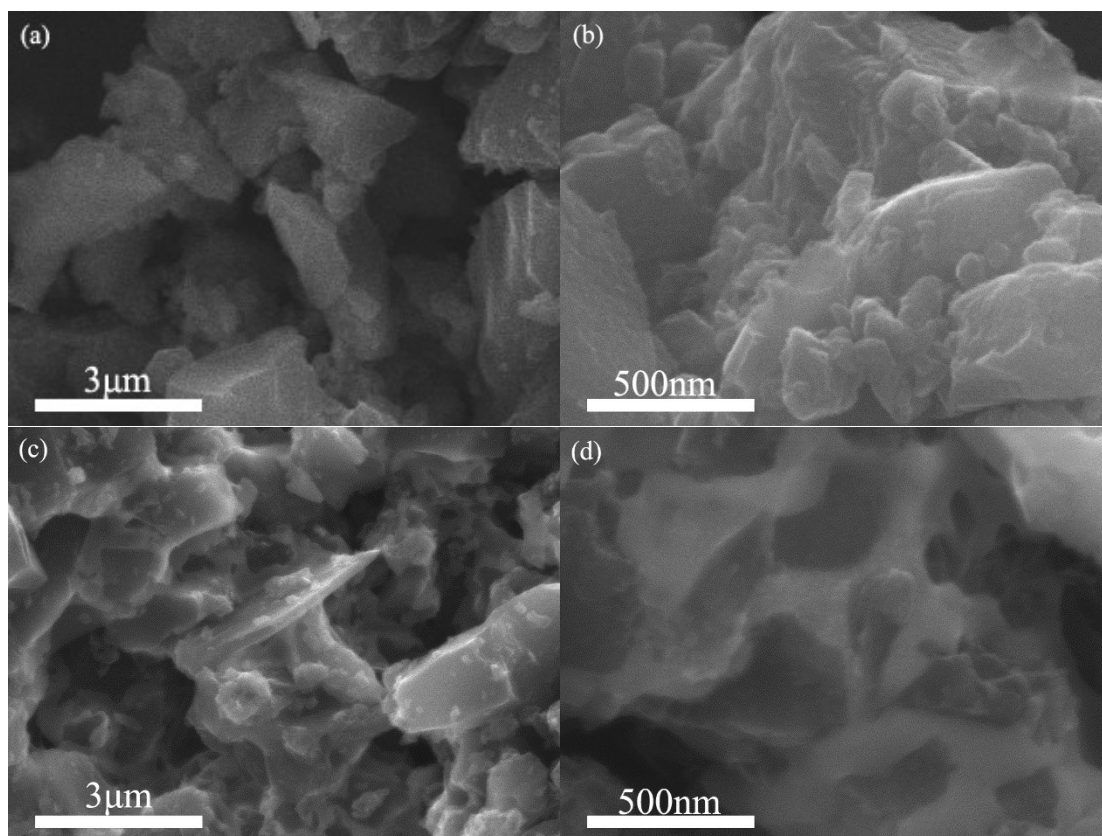

Fig. S3 SEM images of OMC, (a) and (b), and OMC/G composites (c) and (d).

As shown in Fig. S3, the surface of OMC/G exhibits much more pore channels than that of OMC. These pore channels are inclined to the impregnation of KOH, causing that much more micropores are formed on OMC/G after KOH activation.
